# Supplementary material for: Cannabigerol (CBG) signal enhancement in its analysis by gas chromatography coupled with tandem mass spectrometry
Source: Springer Nature journal article supplement (doi:10.1007/s11419-023-00673-x), 2023-09-27

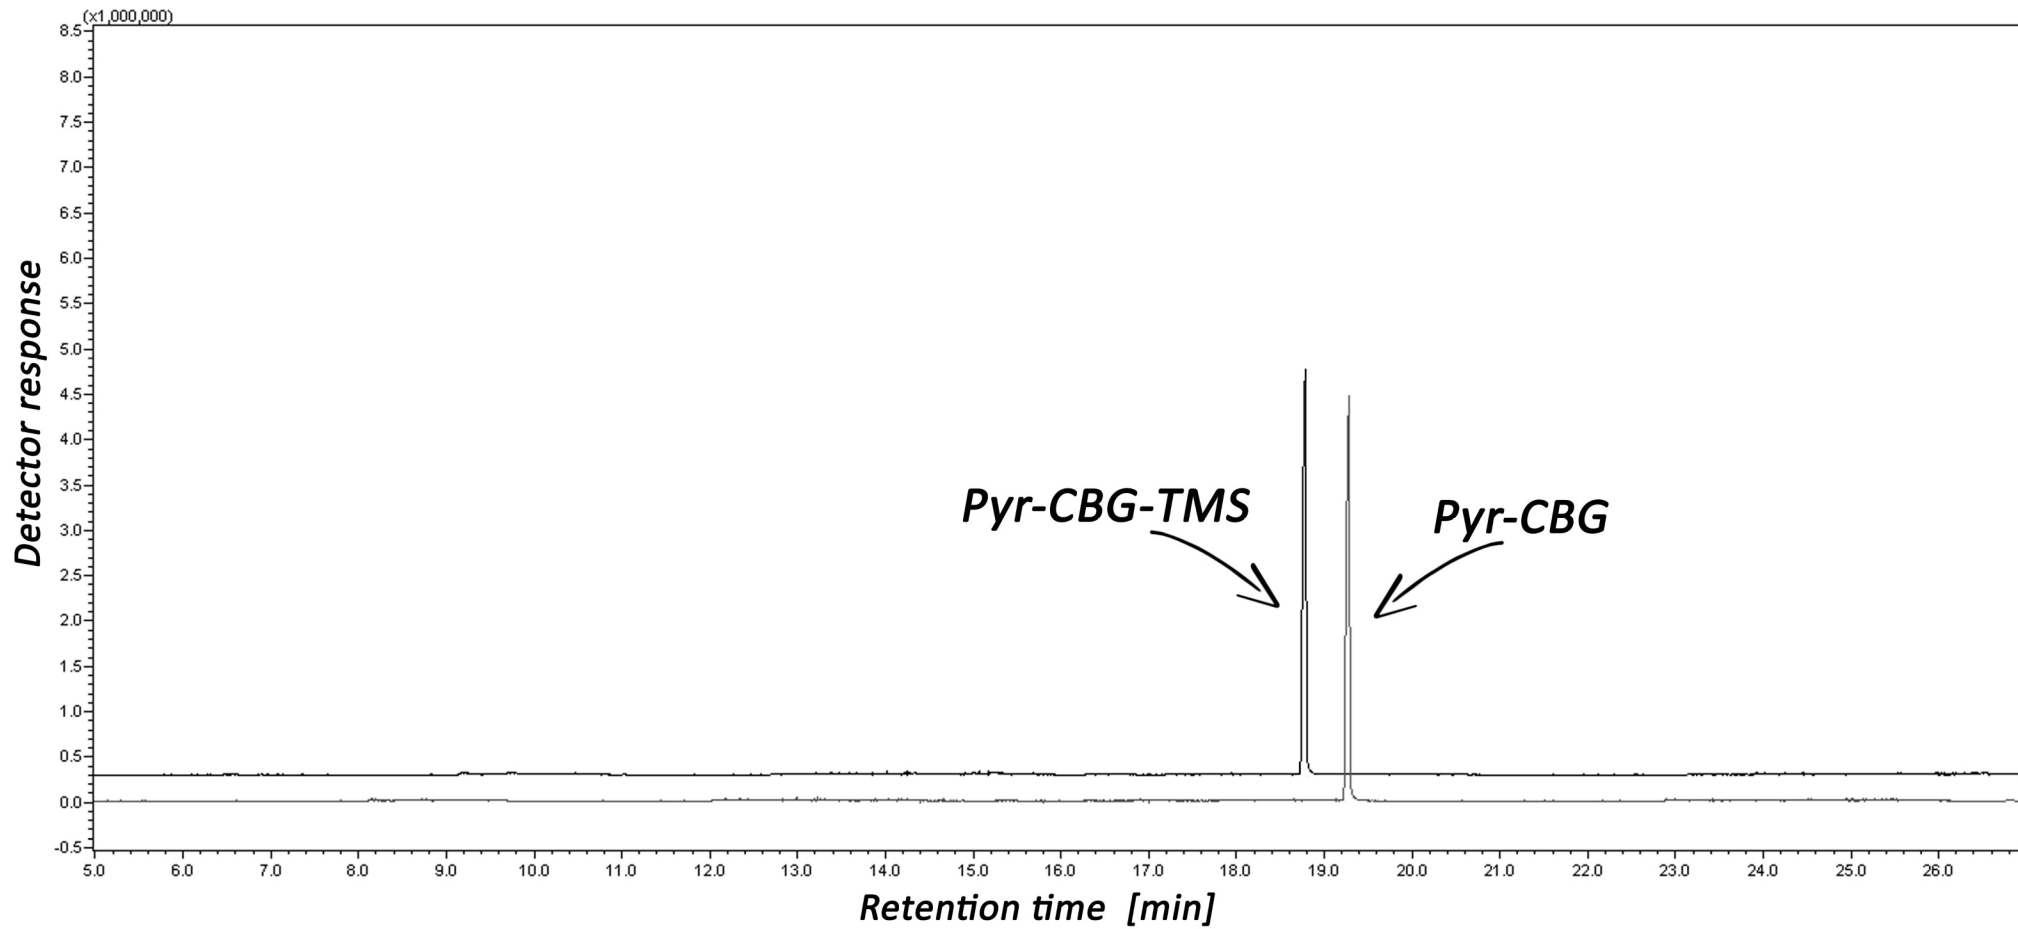

Supplement: MOESM2 [file 11419_2023_673_MOESM2_ESM.pdf]
